# Supplementary material
Source: publisher site journal article supplement (https://www.dovepress.com/article/580640)
Supplement: Supplementary file 1 [file 580640%20Revised%20Supplementary%20Materials.pdf]

## Supplemental Figure

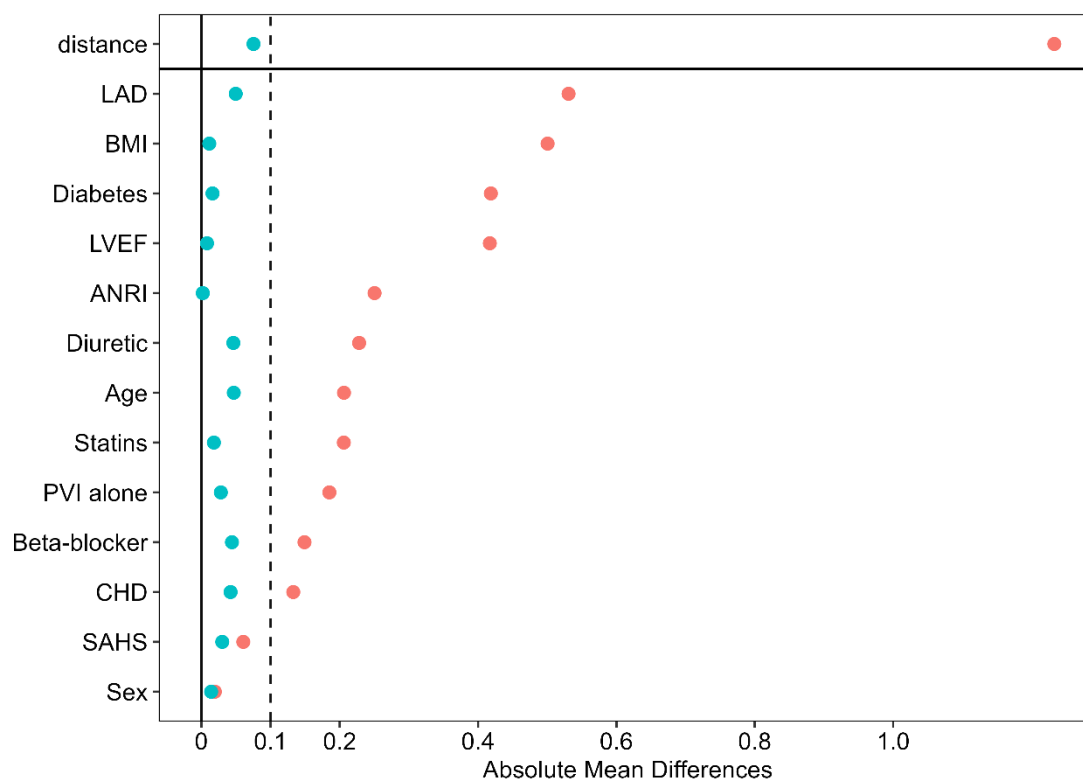

**Supplementary Figure S1** Covariate balance before and after propensity score matching. The horizontal axis represents the standardized mean difference, and the vertical axis lists various variables. Red circles represent the unadjusted cohort; green circles represent the adjusted (matched) cohort. The vertical dashed line represents the threshold of 0.1, indicating acceptable balance. Variables are ordered by the magnitude of imbalance before matching. SMD values closer to zero indicate better balance between the SGLT2i and control groups.

Abbreviations: LAD, left atrial diameter; BMI, body mass index; LVEF, left ventricular ejection fraction; ANRI, angiotensin receptor-enkephalinase inhibitor; PVI, pulmonary vein isolation; CHD, coronary heart disease; SAHS, sleep apnea-hypopnea syndrome

## Supplementary Tables

**Supplementary Table S1** Baseline characteristics of the study population before and after propensity score matching

|                              | Before Matching   | After Matching   |
|------------------------------|-------------------|------------------|
|                              | n=430             | n=242            |
| Male                         | 229 (53.3)        | 134 (55.4)       |
| Age(years)                   | 69 (62,74)        | 69 (64,74)       |
| BMI(kg/m <sup>2</sup> )      | 25.2±3.3          | 25.8±3.1         |
| Diagnosis                    |                   |                  |
| Paroxysmal AF                | 231 (53.7)        | 119 (49.2)       |
| Persistent AF                | 199 (46.3)        | 123 (50.8)       |
| Duration(years)              | 2 (0.2,4)         | 1 (0.2,4)        |
| Smoke                        | 79 (18.4)         | 46 (19)          |
| Drink                        | 47 (10.9)         | 27 (11.2)        |
| Diabetes                     | 193 (44.9)        | 170 (70.2)       |
| SAHS                         | 25 (5.8)          | 16 (6.6)         |
| Hypertension                 | 298 (69.3)        | 183 (75.6)       |
| CHD                          | 103 (24)          | 73 (30.2)        |
| Stroke                       | 38 (8.8)          | 27 (11.2)        |
| Hyperlipidemia               | 89 (20.7)         | 51 (21.1)        |
| HbA1c(%)                     | 6.1 (5.7,6.8)     | 6.5 (6,7.2)      |
| WBC(×10 <sup>9</sup> /L)     | 6.3 (5.3,7.5)     | 6.4 (5.6,7.7)    |
| NEUT(%)                      | 63.4±9.1          | 64±9             |
| NT-proBNP(pg/mL)             | 430.5 (142,899.2) | 484 (150,1157.5) |
| Cr(umol/L)                   | 72 (63,83.2)      | 75 (63,86)       |
| TG(mmol/L)                   | 1.3 (1,1.9)       | 1.3 (1,1.9)      |
| LAD(mm)                      | 43.7±5.6          | 44.7±5.3         |
| LVEF(%)                      | 58 (54.2,62)      | 58 (54,62)       |
| Medications                  |                   |                  |
| Diuretic                     | 60 (14)           | 46 (19)          |
| ANRI                         | 69 (16)           | 48 (19.8)        |
| Beta-blocker                 | 187 (43.5)        | 123 (50.8)       |
| Statins                      | 270 (62.8)        | 186 (76.9)       |
| Propafenone                  | 9 (2.1)           | 5 (2.1)          |
| Amiodarone                   | 121 (28.1)        | 66 (27.3)        |
| ACEI /ARB                    | 160 (37.2)        | 93 (38.4)        |
| Metformin                    | 69 (16)           | 66 (27.3)        |
| Glinides                     | 8 (1.9)           | 7 (2.9)          |
| DPP4i                        | 10 (2.3)          | 8 (3.3)          |
| Sulfonylurea                 | 29 (6.7)          | 28 (11.6)        |
| Alpha-glucosidase inhibitors | 39 (9.1)          | 37 (15.3)        |
| Insulin                      | 20 (4.7)          | 18 (7.4)         |
| Ablation type                |                   |                  |
| PVI alone                    | 279 (64.9)        | 144 (59.5)       |
| SVC                          | 59 (13.7)         | 35 (14.5)        |

|                                         |            |            |
|-----------------------------------------|------------|------------|
| Linear ablation                         | 37 (8.6)   | 21 (8.7)   |
| BOX                                     | 58 (13.5)  | 41 (16.9)  |
| Further substrate modification          | 18 (4.2)   | 10 (4.1)   |
| Intraoperative Electrical Cardioversion | 176 (40.9) | 108 (44.6) |

Values are expressed as mean  $\pm$  SD, median (IQR), or n (%).

Abbreviations: BMI, body mass index; SAHS, sleep apnea-hypopnea syndrome; CHD, coronary heart disease; HbA1c, hemoglobin A1C; WBC, white blood cell; NEUT, neutrophil percentage; NT-proBNP, N-terminal pro-brain natriuretic peptide; Cr, creatinine; TG, triglyceride; LAD, left atrial diameter; LVEF, left ventricular ejection fraction; ANRI, angiotensin receptor-enkephalinase inhibitor; ACEI, angiotensin-converting enzyme inhibitor; ARB, aldosterone receptor blocker; DPP4i, dipeptidyl peptidase 4 inhibitors; PVI, pulmonary vein isolation; SVC, superior vena cava

**Supplementary Table S2 Multivariate Cox regression analysis including all ablation strategies in the propensity-scored matched cohort**

| Variables                      | aHR* (95% CI)      | p-value |
|--------------------------------|--------------------|---------|
| Sex                            | 0.684(0.373-1.254) | 0.220   |
| Age                            | 0.985(0.952-1.019) | 0.374   |
| Diagnosis                      | 1.621(0.8-3.284)   | 0.180   |
| Duration                       | 1.070(1.014-1.128) | 0.013   |
| Diabetes                       | 0.76(0.336-1.721)  | 0.511   |
| HbA1c                          | 0.792(0.549-1.144) | 0.214   |
| SGLT2i                         | 0.450(0.217-0.932) | 0.032   |
| Diuretic                       | 1.187(0.575-2.449) | 0.643   |
| Amiodarone                     | 1.719(0.911-3.244) | 0.094   |
| Metformin                      | 0.535(0.221-1.295) | 0.166   |
| SVC                            | 1.463(0.57-3.754)  | 0.429   |
| Linear ablation                | 0.425(0.102-1.779) | 0.241   |
| BOX                            | 1.013(0.476-2.155) | 0.972   |
| Further substrate modification | 0.684(0.158-2.962) | 0.612   |

Values are presented as hazard ratios (95% confidence intervals).

\*Hazard ratios were adjusted for sex, age, diagnosis, duration, diabetes, HbA1c, diuretic, amiodarone, metformin, SVC, linear ablation, BOX, and further substrate modification.

Abbreviations: CI, confidence interval; HR, hazard ratio; aHR, adjusted hazard ratio
